# Supplementary material for: Engineering Saccharomyces cerevisiae and controlling conditions for 2,3-butanediol production from glycerol
Source: Royal Society of Chemistry journal article supplement (doi:10.1039/d4se00912f), 2024-01-01
Supplement: d4se00912f1.pdf [file d4se00912f1.pdf]

## **Engineering *Saccharomyces cerevisiae* and Controlling Conditions for 2,3-Butanediol Production from Glycerol**

Sadat Mohamed Rezk Khattab<sup>1,2\*,3</sup>, Mohamed Ali Abdel-Rahman<sup>1,4#</sup>, Masato Katahira<sup>2,5,6,7</sup>,

Takashi Watanabe<sup>1,5</sup>

<sup>1</sup>Research Institute for Sustainable Humanosphere, Kyoto University, Gokasho, Uji, Kyoto 611-0011, Japan

<sup>2</sup>Institute of Advanced Energy, Kyoto University, Gokasho, Uji, Kyoto 611-0011, Japan

<sup>3</sup>Faculty of Science, Al-Azhar University, Assiut, 71524, Egypt

<sup>4</sup>Botany and Microbiology Department, Faculty of Science (Boys), Al-Azhar University, Nasr, Cairo 11884, Egypt.

<sup>5</sup>Biomass Product Tree Industry-Academia Collaborative Research Laboratory, Kyoto University, Gokasho, Uji, Kyoto 611-0011, Japan

<sup>6</sup>Graduate School of Energy Science, Kyoto University, Gokasho, Uji, Kyoto 611-0011, Japan

<sup>7</sup>Integrated Research Center for Carbon Negative Science, Institute of Advanced Energy, Kyoto University, Gokasho, Uji, Kyoto 611-0011, Japan

\*,# Current addresses

Corresponding authors: Sadat Mohamed Rezk Khattab,

[khattab.sadatmohamedrezk.7c@kyoto-u.ac.jp](mailto:khattab.sadatmohamedrezk.7c@kyoto-u.ac.jp); <https://orcid.org/0000-0001-6755-5789>

Takashi Watanabe, [twatanab@rish.kyoto-u.ac.jp](mailto:twatanab@rish.kyoto-u.ac.jp) <https://orcid.org/0000-0003-0220-4157>

Supplementary Data

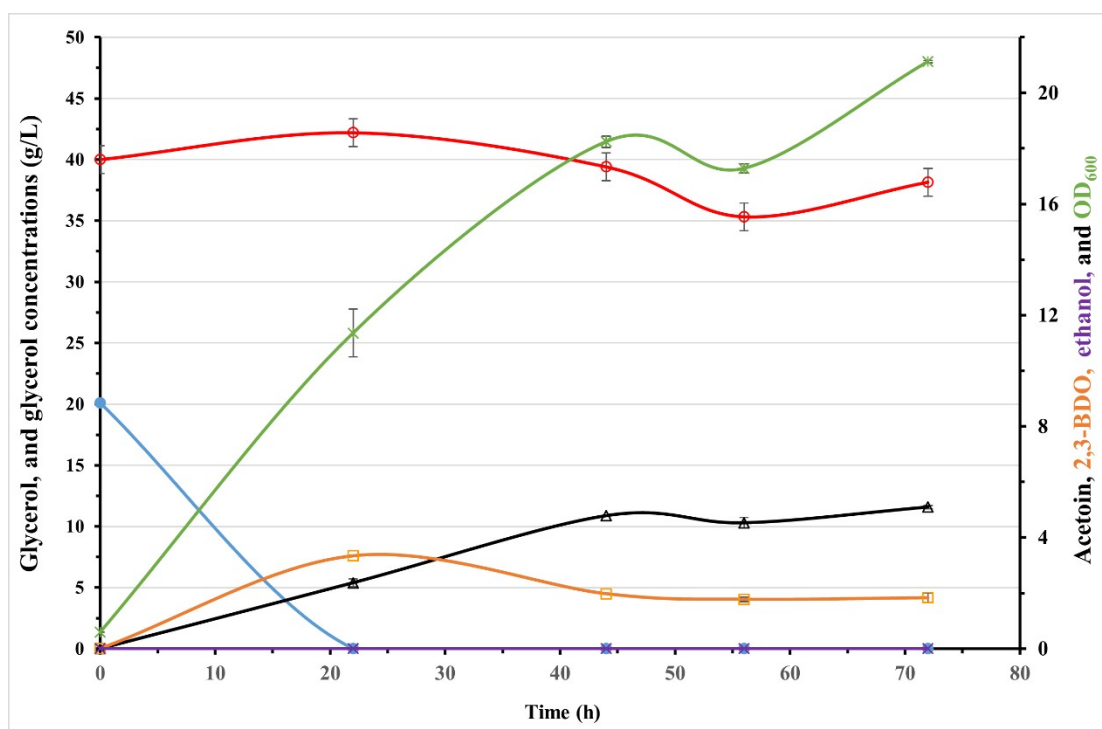

**Fig. S1.** Time course aerobic fermentation of glycerol-glucose mixture by SK-MA5, which replaced *ScADH1* with 2,3-BDO in the native strain (D452-2). The fermentation was carried out in 100-ml Erlenmeyer flasks containing 10 mL of YPD<sub>D20G40</sub>, with orbital shaking at 200 rpm at 30°C. Glycerol (red open circle), glucose (sky blue closed circle), acetoin (black open triangle), 2,3-BDO (orange open square), and OD<sub>600</sub> (green star) were monitored. The data represents the SD of the average of two independent experiments.

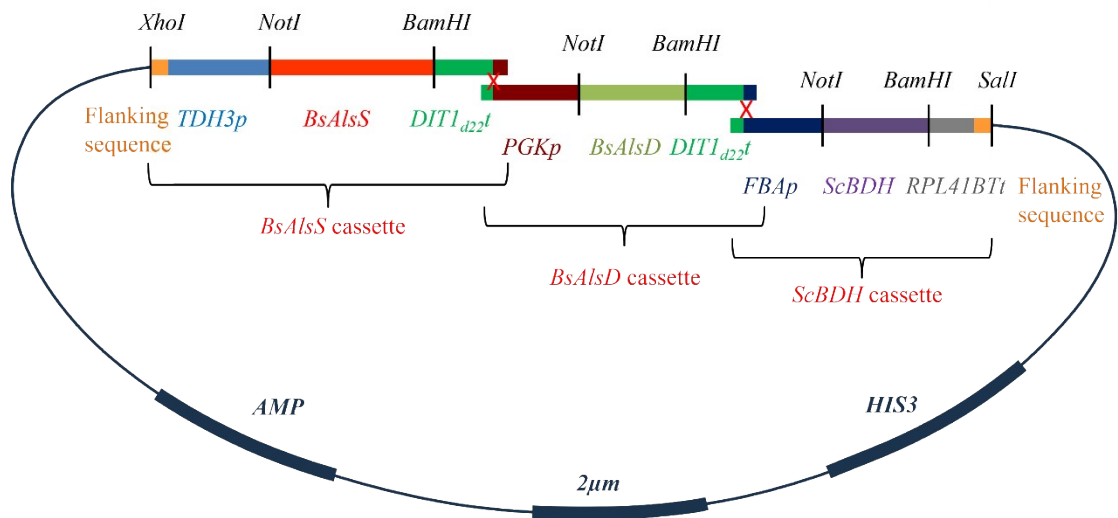

**Fig. S2.** Diagram illustrating the construction of the 2,3-BDO module in the HIS3 plasmid.





cggatcttcacgagtacttgatggccaatctcatgcctaaagatggagagtccataaattatccaacgctgctttacctctggcaatgggcatga  
gatgtcagggaattgtttccaaggttgctctaaagtgacaaagggaaggtggcgaccacgtggtcgttgatgctgccagcagttgtcggacctgc  
attgctggccacacccaatttacaattccaaccatgtgatgcttgcagaggggcagtgaaaatctatgtaccacgccggtttgtaggactaggt  
gtgatcagtggtggccttctgaacaagctgtagtctcaacatcacattatccgggtccaaggaaatcctctagatgtggctgcttagttgacct  
cttctgtcacctggcatgctgtaagattctggttcaaaaaaggcagttcagccttggcttgggtgcaggtcccattgggtgtgtaccatttggfactt  
aagggaatgggggctagtaaaattgtagtctgaaattgcagagagaagaatagaaatggccaagaaactgggcgttgagggttcaatccctcca  
agcacggtcataaatctatagatactacgtggttgaccaagacccatgatgggttgattacagttatgattgttctgttattcaagtacttctgaaac  
cttttgaaggcattaacattcaaggggacaccaccaacattgcagtttggggtccaaaacctgtccattccaaccaatggatgtgactctcaaga  
gaaagttatgactgggtcgtcggctatgttgcgaagactcgaagaagttgtcgtccatccacaacggagacatcgccatggaagattgtaagca  
actaatcactggttaagcaaggttgaggacgggtgggaaaaaggattccaagagttgatggatcacaaggaatccaacgtaagattctattgacgc  
ctaacaatcacgggtgaaatgaagtaaggatccggttgattgagagcaaatgtaagttcaggtcaagtaaaaattgatttcgaaaactaattctctata  
caatccttgattggaccgtatccttctgaaataagatttgttaagaatatttagacagagatctactttatattaatctagatattacataattctct  
ctaataaaatatacattaataaaataaaaatgaagcgatttgatttgggtgcaacttagttgccgctatgcctcttgggtaagtctatttgaatcgaagg  
gctttattatattaccctttagcttattctgaggttctgtggcgtgcaaagtgatgaaccgggcgggttttaaggataaaatcaaaaagtgaaaaatgaa  
cggaaaatggaatacctgtgaaatggagaatgataatgaatcttctgtcgtcgttgaagatttccgcaatttctatgattatgattttattataaata  
agttataaaaaaataagtcgacaaa

---
